# Supplementary material
Source: PubMed Central journal article supplement (PMC5607399)

**A) Mean ATP4 expression**

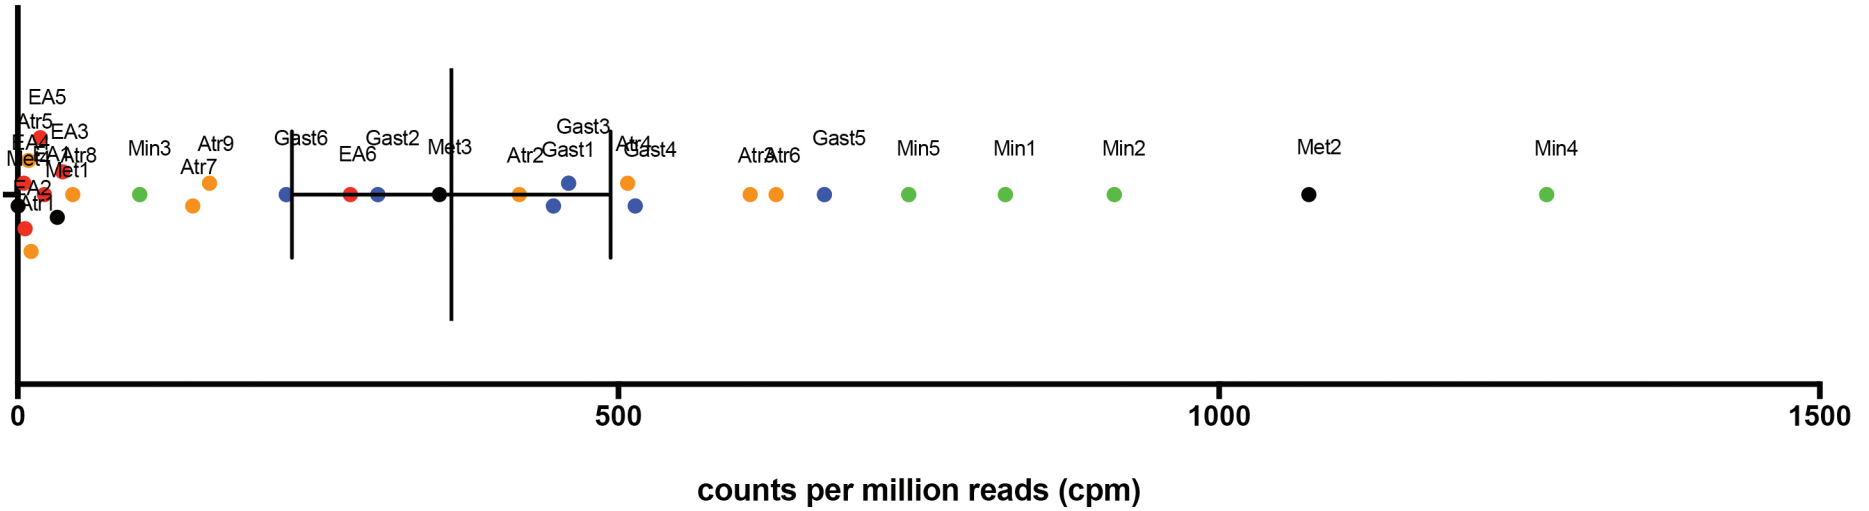

**B) Atrophy score**

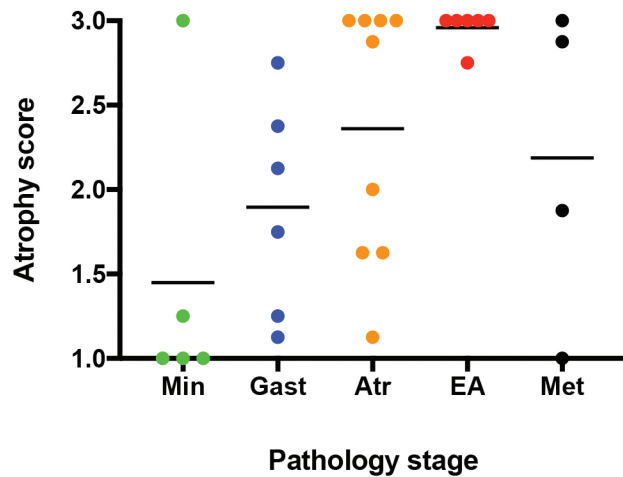

**C) Atrophy score/ATP4 expression**

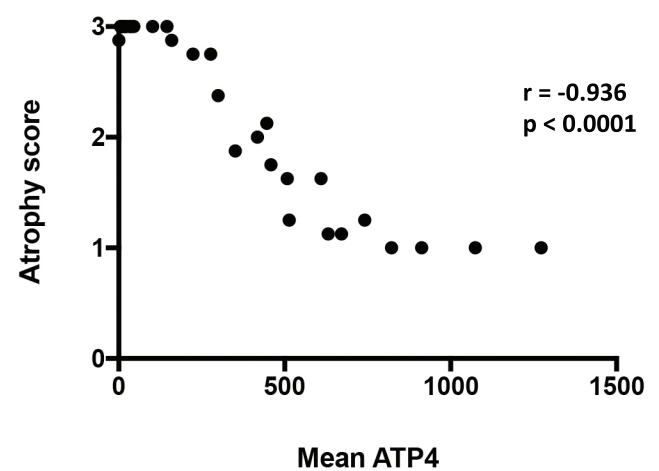

Supplement: IAI.00031-17_zii999092151s1.pdf [file IAI.00031-17_zii999092151s1.pdf]

A)

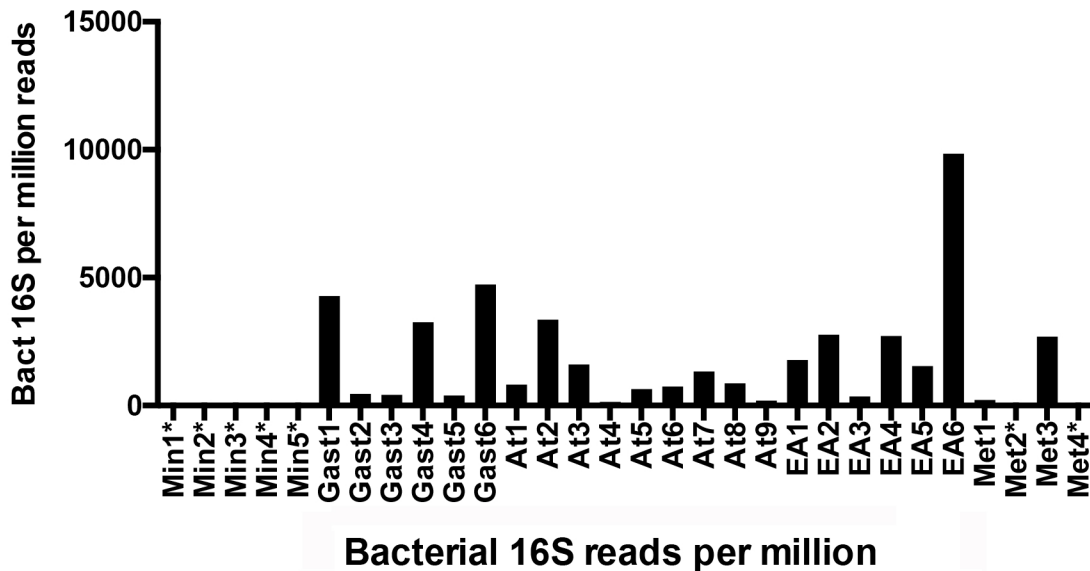

B)

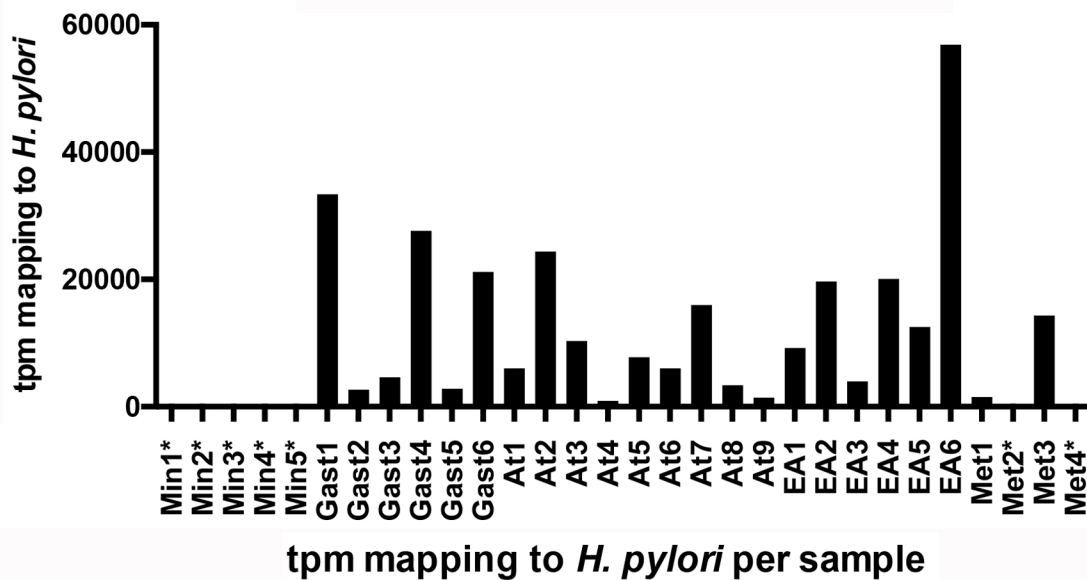

Supplement: IAI.00031-17_zii999092151s2.pdf [file IAI.00031-17_zii999092151s2.pdf]

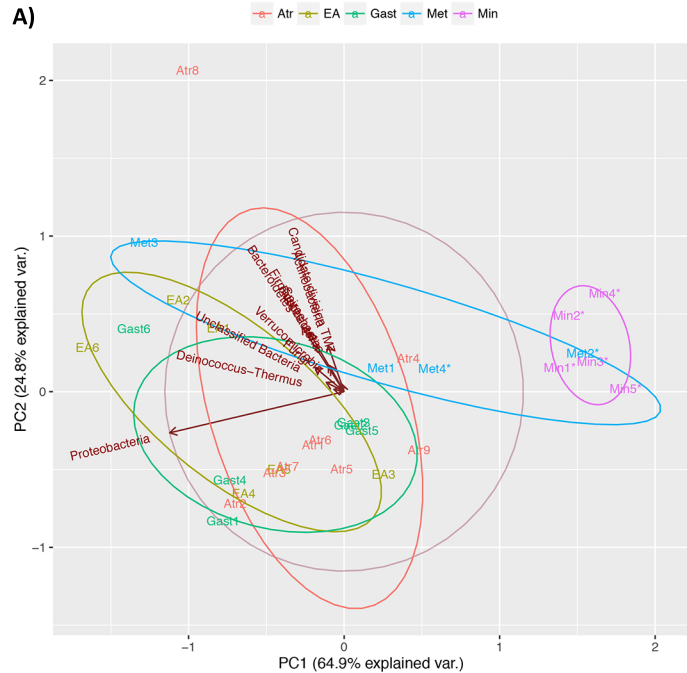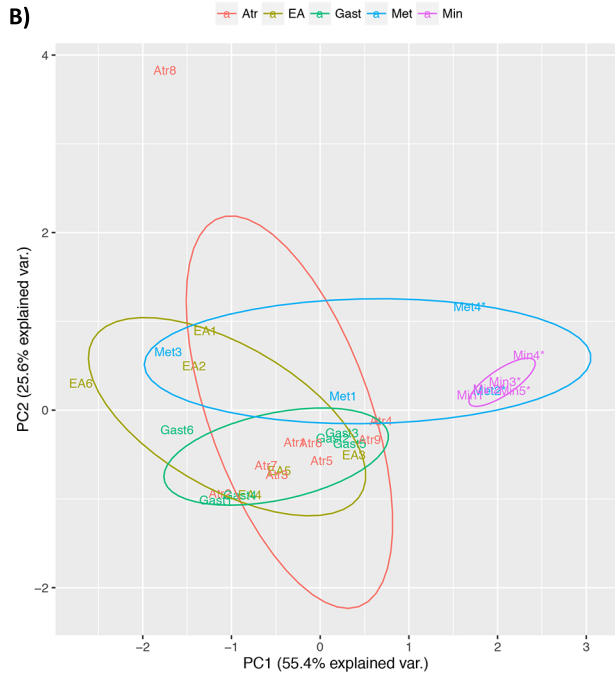

Supplement: IAI.00031-17_zii999092151s5.pdf [file IAI.00031-17_zii999092151s5.pdf]

A)

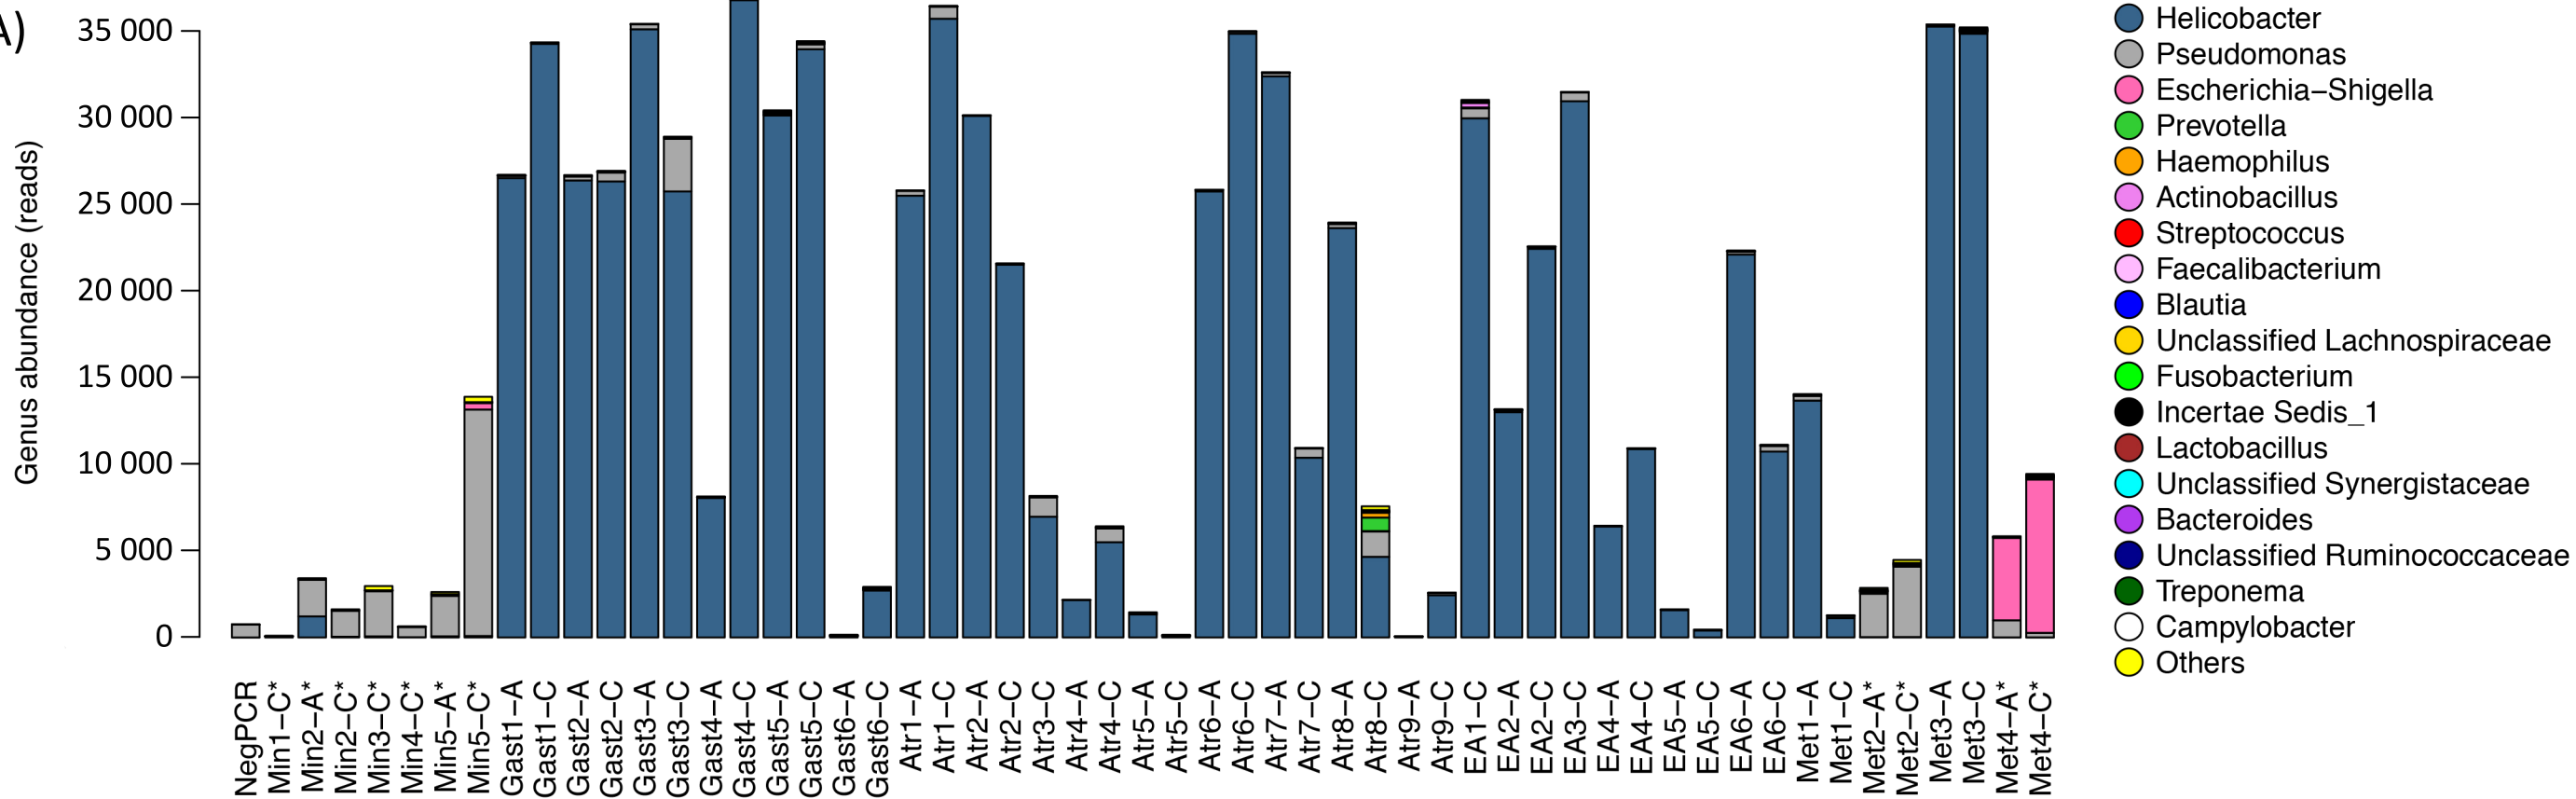

B)

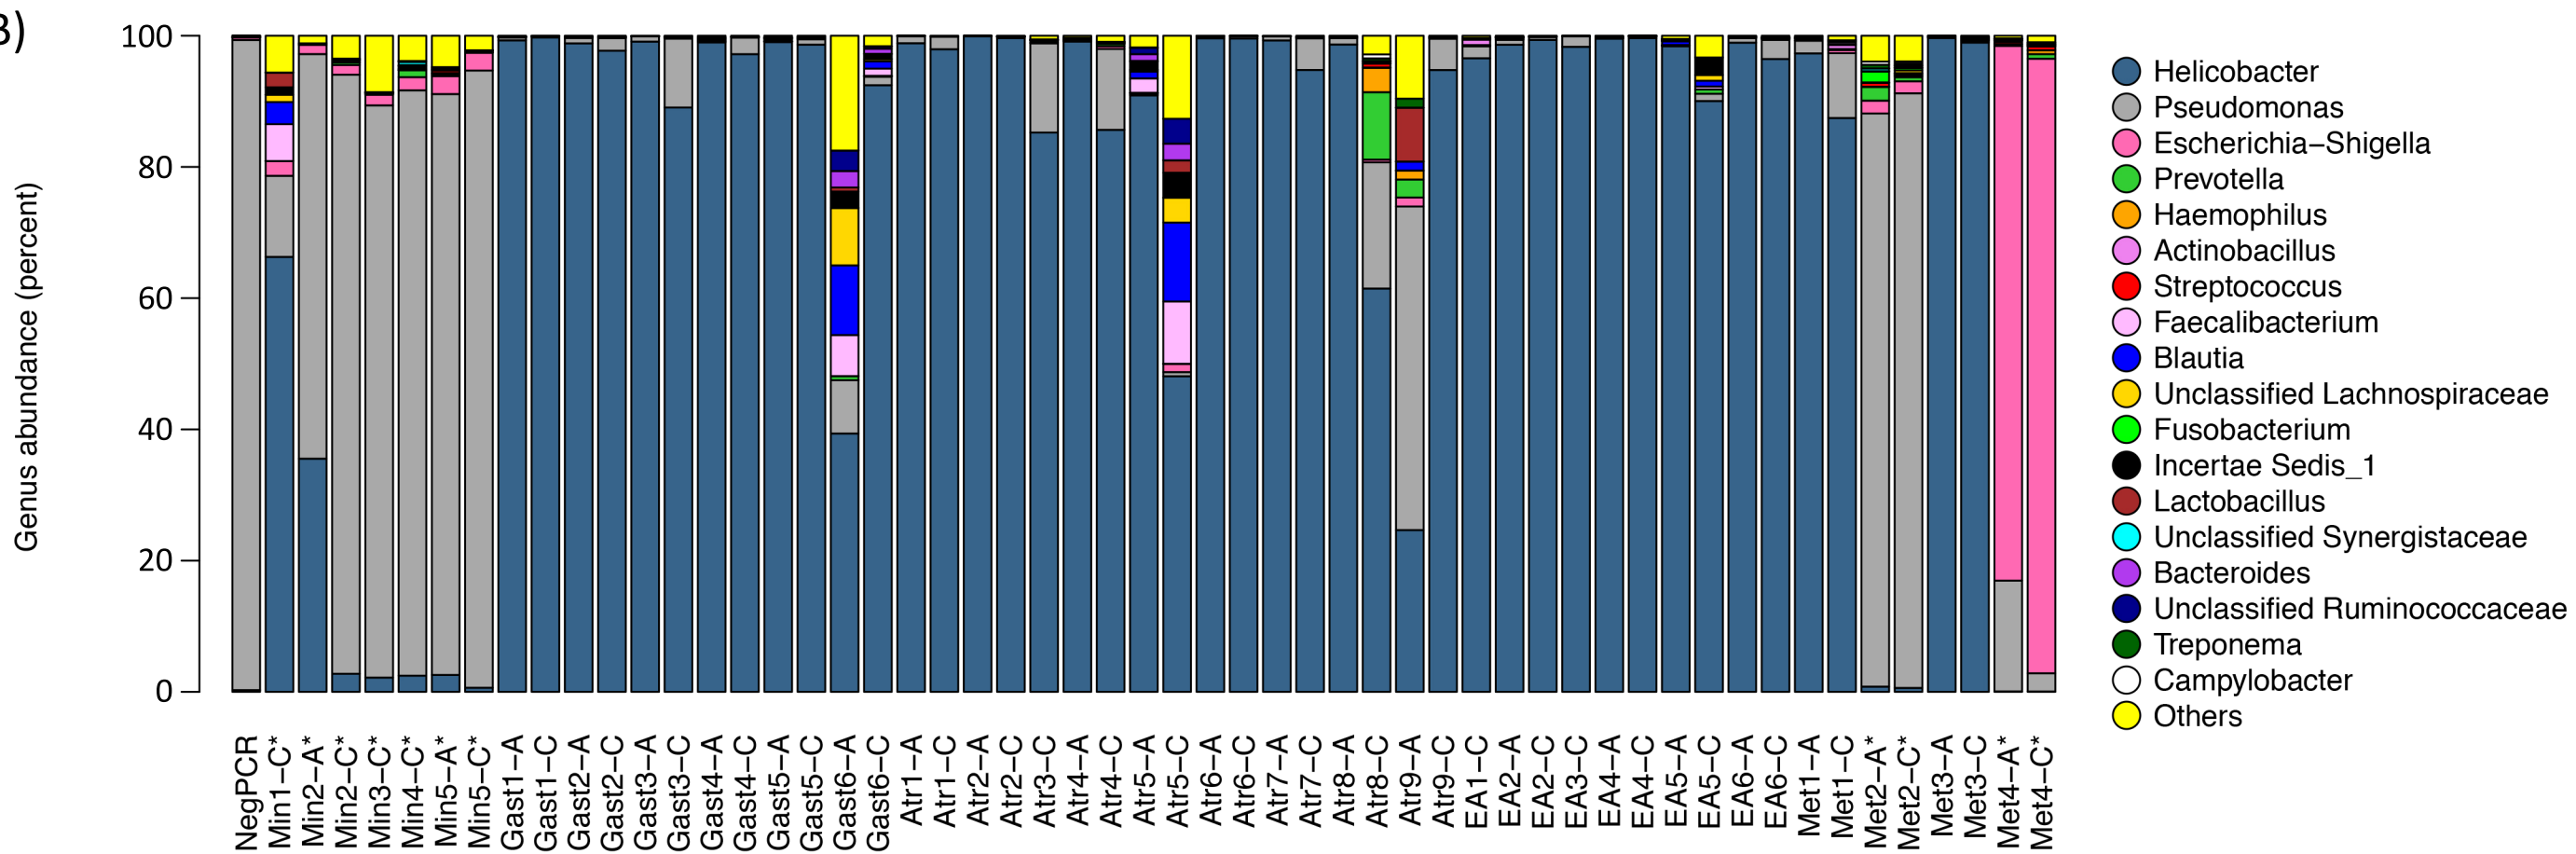

Supplement: IAI.00031-17_zii999092151s6.pdf [file IAI.00031-17_zii999092151s6.pdf]

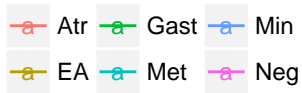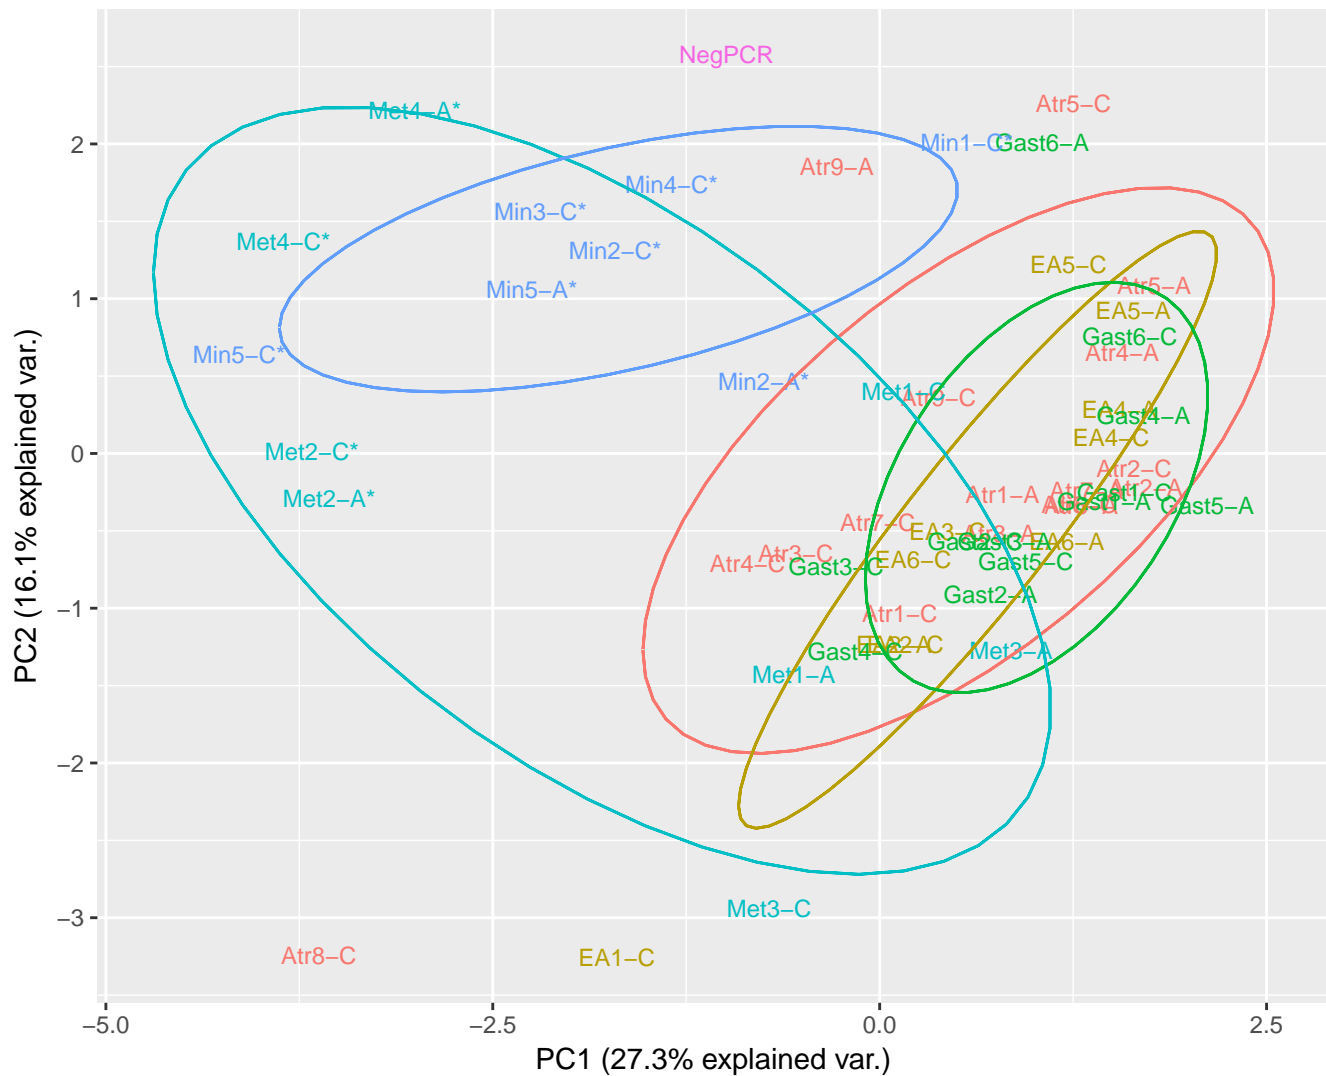

Supplement: IAI.00031-17_zii999092151s7.pdf [file IAI.00031-17_zii999092151s7.pdf]
